1  
2  
3  
4  
5  
6  
7  
8  
9  
10  
11  
12  
13  
14  
15  
16  
17  
18  
19  
20  
21  
22  
23  
24  
25

## Selection, succession and stabilization of soil microbial consortia

Elias K. Zegeye<sup>1,2</sup>, Colin J. Brislawn<sup>1</sup>, Yuliya Farris<sup>1</sup>, Sarah J. Fansler<sup>1</sup>, Kirsten S. Hofmockel<sup>3,4</sup>, Janet K. Jansson<sup>1</sup>, Aaron T. Wright<sup>1,2</sup>, Emily B. Graham<sup>1</sup>, Dan Naylor<sup>1</sup>, Ryan S. McClure<sup>1\*</sup>, Hans C. Bernstein<sup>1,2,5,6\*</sup>

**Affiliations:** <sup>1</sup>Biological Sciences Division, Pacific Northwest National Laboratory, Richland, WA, USA; <sup>2</sup>The Gene and Linda Voiland School of Chemical Engineering and Bioengineering, Washington State University, Pullman, WA, USA; <sup>3</sup>Environmental Molecular Sciences Laboratory, Pacific Northwest National Laboratory, Richland, Washington, USA; <sup>4</sup>Department of Ecology, Evolution and Organismal Biology, Iowa State University, Ames, USA; <sup>5</sup>Faculty of Biosciences, Fisheries and Economics, UiT - The Arctic University of Norway, 9019, Tromsø, Norway; <sup>6</sup>The Arctic Centre for Sustainable Energy, UiT - The Arctic University of Norway, Tromsø, Norway

**\* Correspondence:**

Hans C. Bernstein, The Arctic University of Norway – UiT, BFE-fak., Postboks 6050 Langnes, 9037 Tromsø, Phone: +47 7764 6114, Email: [Hans.C.Bernstein@uit.no](mailto:Hans.C.Bernstein@uit.no);  
Ryan McClure, Pacific Northwest National Laboratory, Richland, WA, 99352, USA, Phone: 509-375-3746; Email: [Ryan.mcclure@pnnl.gov](mailto:Ryan.mcclure@pnnl.gov)

**Keywords:** Chitin, N-acetyl glucosamine, Succession, Microbial Consortia, Soil Microbiome, Model Microbiome, Microbiome Stability

26 **ABSTRACT**

27 Soil microorganisms play fundamental roles in cycling of soil carbon, nitrogen and other  
28 nutrients, yet we have a poor understanding of how soil microbiomes are shaped by their  
29 nutritional and physical environment. Here we investigated the successional dynamics of a soil  
30 microbiome during 21-weeks of enrichment on chitin and its monomer, *N-acetylglucosamine*.  
31 We examined succession of the soil communities in a physically heterogeneous soil matrix as  
32 well as a highly mixed liquid medium. The guiding hypothesis was that the initial species  
33 richness would influence the tendency for the selected consortia to stabilize and maintain  
34 relatively constant community structure over time. We also hypothesized that long term,  
35 substrate-driven growth would result in consortia with reduced species richness as compared to  
36 the parent microbiome and that this process would be deterministic with relatively little variation  
37 between replicates. We found that the initial species richness does influence the long-term  
38 community stability in both liquid media and soil and that lower initial richness results in a more  
39 rapid convergence to stability. Despite use of the same soil inoculum and access to the same  
40 major substrate, the resulting community composition differed greatly in soil compared to liquid  
41 medium. Hence, distinct selective pressures in soils relative to homogenous liquid media exist  
42 and can control community succession dynamics. This difference is likely related to the fact that  
43 soil microbiomes are more likely to thrive, with fewer compositional changes, in a soil matrix  
44 compared to liquid environments.

45

46 **IMPORTANCE**

47 The soil microbiome carries out important ecosystem functions, but interactions between soil  
48 microbial communities have been difficult to study due to the high microbial diversity and

49 complexity of the soil habitat. Here we successfully obtained stable consortia with reduced  
50 complexity that contained species found in the original source soil. These consortia and the  
51 methods used to obtain them can be a valuable resource for exploration of specific mechanisms  
52 underlying soil microbial community ecology. The results of this study also provide new  
53 experimental context to better inform how soil microbial communities are shaped by new  
54 environments and how a combination of initial taxonomic structure and physical environment  
55 influences stability.  
56

## 57 INTRODUCTION

58 Soil microbiomes are among the most diverse microbial communities on the planet (1, 2) and the  
59 majority of soil microbes have not yet been cultivated or studied under laboratory conditions.  
60 This, and other confounding properties, such as extreme spatial heterogeneity, make it difficult to  
61 study how soil microorganisms interact within natural communities (3). Despite this, a deeper  
62 understanding of the ecological properties that control the structure and function of soil  
63 microbiomes is needed as they underpin almost every terrestrial food web (4), regulate many  
64 elements of Earth's biogeochemical cycles (5) and are fundamental for growth of healthy crops  
65 and bioenergy feedstocks (6).

66 Well established studies estimate that annual CO<sub>2</sub> emissions from soil microbial  
67 respiration are ten times greater than the CO<sub>2</sub> produced by fossil fuel utilization (5). Therefore,  
68 small changes in the soil carbon cycle – a process linked to microbiome functioning – can have  
69 large impacts on atmospheric CO<sub>2</sub> concentrations. The cycling of complex biopolymers that are  
70 both produced and stored in soils largely influences the flux of CO<sub>2</sub> to the atmosphere. Of these,  
71 chitin, an insoluble β-1, 4-linked polymer of *N-acetylglucosamine* (NAG) (7, 8), is a major  
72 substrate for soil microbial activity (9) and represents a linkage between the carbon and nitrogen  
73 cycles in soils (10-12). Chitin is omnipresent in soil and is an important biopolymer synthesized  
74 by fungi (13) and many insects. However, little is known about how chitin and NAG can select  
75 for soil-specific bacterial and fungal taxa and influence the structure of microbial communities  
76 that are involved in their decomposition.

77 Successional dynamics of soil microbiomes are related to changes in substrate  
78 availability and are crucial to predicting ecosystem development (14-20). During primary  
79 succession, early colonizing taxa shape available niche space by regulating pH and nutrient

80 availability (16, 17, 21). However, the feedbacks and processes driving successional patterns  
81 constitute fundamental knowledge gaps in understanding trajectories of ecosystem development  
82 (16, 19). Microbial succession patterns can be influenced by available resources, including  
83 nutrient pools (19, 22), physiochemistry (23), and vegetation (24). Additionally, it is well known  
84 that soil moisture is a key determinant of microbial metabolism (25-27). Less is known about  
85 how the physical environment, with respect to soil or liquid-like conditions, affect microbial  
86 community succession and stability. The relative stability of microbial communities through  
87 early succession and thereafter is key to understanding and predicting microbial responses to  
88 perturbation (28-31). While the immense complexity of soil microbiomes has hindered many  
89 efforts to describe the succession dynamics to ecosystem functioning, organic matter chemistry  
90 has been identified as a key driver of primary succession (32).

91         In this study, we aimed to investigate processes underlying soil microbial community  
92 succession by monitoring microbial community development in a sterile soil matrix enriched  
93 with NAG. Comparisons were made over the course of 15-weeks of succession to a liquid  
94 medium culture derived from the same inoculum. In this way, environmental successional  
95 trajectories of the soil microbiome were directly compared to community development using  
96 traditional, liquid-based culturing methods that omit the heterogenous chemical and spatial  
97 landscapes associated with the soil matrix.

98         We hypothesized that initial species richness would influence the succession of the  
99 consortia and their ability to stabilize with a relatively constant taxonomic structure over time.  
100 Specifically, we anticipated that consortia with lower species richness during the initial phases of  
101 succession would display higher tendencies to converge towards smaller changes in community  
102 structure between successive time points. We also hypothesized that long term selection by NAG

103 would result in soil microbial consortia with reduced complexity as compared to the parent soil  
104 microbiome and that this process would be deterministic with relatively little variation between  
105 replicates during enrichment.

106 To test these hypotheses, we investigated the influence of initial richness and physical  
107 environment on the progression of chitin/NAG enriched soil microbial consortia. We designed  
108 soil microbiome enrichment experiments with the expectation that dilution and long-term  
109 selection on chitin/NAG would dramatically reduce the initial community richness when  
110 compared to the native soil. One of our aims was to use this procedure to obtain simplified,  
111 naturally adapted consortia that can serve as a valuable experimental resource that can be shared  
112 for recapitulating some soil microbiome behaviors. We also expected and found that the  
113 consortia that did emerge from this long-term succession experiment showed distinct differences  
114 based on the physical environment (soil verses liquid). This study has improved our  
115 understanding about the succession and stability of microbial communities in soil. Generally,  
116 these results show that the final stability of and the extent of species richness were directed by  
117 the length of succession, the initial richness, and the culturing environment.

118

## 119 **RESULTS**

120 **Enrichment of a native soil microbiome on chitin.** Native soil was supplemented in triplicate  
121 with 3 concentrations of chitin (10, 50 and 100 ppm) for six-weeks to select for naturally co-  
122 existing soil populations capable of using chitin as a carbon and/or nitrogen substrate.  
123 Respiration was monitored during the enrichment as a proxy for soil microbial activity during  
124 chitin decomposition. The highest respiration was observed for the highest chitin concentration

125 and therefore the 100 ppm treatments were used to inoculate longer term enrichments  
126 supplemented with NAG.

127 The dominant bacterial phyla in the native soil communities were *Proteobacteria*,  
128 *Actinobacteria*, *Acidobacteria*, *Chloroflexi* and *Bacteroidetes*; there were few archaea identified  
129 in high relative abundance (Fig. 1) (Supplemental Fig. S1A). The dominant fungi were  
130 *Ascomycota* (Supplemental Fig. S1B). The native soil bacterial richness had a mean of  $818.5 \pm$   
131  $75.6$  16S OTUs (Supplemental Fig. S1C). The native soil bacterial community also exhibited  
132 high evenness, with a Simpson's Evenness score of 0.3; the most abundant OTU accounted for  
133 less than 4% of all observations. In comparison to the 16S results, the fungal richness and  
134 evenness in the native soil were much lower (Supplemental Fig. S1D). The mean ITS OTU count  
135 was  $128 \pm 39$ , with a Simpson's Evenness score of only 0.069, and the top two OTUs together  
136 comprised 41% of the observed fungal community.

137 Following the initial 6-week chitin enrichment, the bacterial community structure shifted  
138 to a higher relative abundance of *Firmicutes* and *Acidobacteria* and less *Actinobacteria*, although  
139 *Proteobacteria* continued to maintain the highest relative abundance (Supplemental Fig. 1A).  
140 Additionally, there were shifts in the fungal communities, with a higher relative abundance of  
141 *Mortierellomycota* and decreased *Ascomycota* compared to the native soil (Supplemental Fig.  
142 1B). Bacterial richness remained statistically unchanged ( $p = 0.7624$ , native soil =  $823.5 \pm 78.5$ ;  
143  $n = 2$ , chitin enriched soil =  $801.7 \pm 26.35$ ;  $n = 3$ ). However, bacterial evenness decreased by  
144 55%, indicating that chitin supplementation selected for a subset of populations. The fungal  
145 species richness and evenness remained essentially unchanged by the chitin supplementation  
146 indicating that the native fungal taxa were less responsive to chitin compared to the bacteria.

147

148 **The structure and taxa of soil and liquid-based consortia.** After chitin enrichment, subsequent  
149 extended enrichment was carried out over 15-weeks using 100 ppm NAG as the major carbon  
150 and nitrogen source. The enrichments were performed in two parallel tracks using the same  
151 source inoculum (soil enriched for 6-weeks with 100 ppm chitin); in both gamma-irradiated  
152 (sterile) soil and liquid M9 medium. The total time for the experiment using chitin enrichment  
153 followed by NAG enrichment was 21-weeks. This experimental design was used to optimize  
154 opportunities for selection of reduced complexity, naturally co-existing soil consortia and to  
155 determine the influence of the physical matrix on the enrichment process. While the physical  
156 differences between soil and liquid are paramount, it is important to note other differences  
157 including carbon/nitrogen sources or pH that may also have an effect on the succession of  
158 resulting consortia.

159 The NAG enrichments were initiated by serial 10-fold dilution of the chitin enriched soil  
160 (dilutions ranged from  $10^{-1}$  to  $10^{-4}$ ) into the irradiated sterile soil and into liquid M9, both  
161 containing 100 ppm of NAG. The relative abundances of both 16S and ITS OTUs differed  
162 between serial dilutions and treatment conditions over the course of the experiment (Fig. 1).  
163 *Proteobacteria* remained the dominant bacterial phylum during the succession period in both the  
164 liquid and soil treatments (Fig. 1A). However, the NAG enriched liquid environment showed a  
165 greater degree of change compared to proportions of the most abundant taxa in the native source  
166 soil. In the NAG enriched liquid medium, members of the *Proteobacteria* and *Ascomycota* phyla  
167 dominated the bacterial and fungal communities, respectively. In contrast, there was a higher  
168 diversity of phyla represented in the NAG enriched soil environment over time. In these samples  
169 we observed increases in typical soil bacteria that are generally difficult to cultivate; namely  
170 *Planctomycetes* and *Verrucomicrobia*. *Planctomycetes* was negligible in all matching liquid



171 incubations and *Verrucomicrobia* was only present to a comparable degree in the least diluted  
172 liquid sample ( $10^{-1}$ ). Simultaneously, we observed depletion of *Acidobacteria* and *Actinobacteria*  
173 in the NAG enriched soil. We also detected a greater number of fungal phyla in communities  
174 grown on the NAG enriched soil compared to its liquid counterpart, with relatively high  
175 proportions of *Mortierellomycota*, *Basidiomycota* and unidentified fungi at the end of the  
176 incubation period (Fig. 1B).

177 As the 15-week NAG enrichments were being regularly sampled for gDNA and  
178 respiration, we employed sterile controls to monitor contamination (Supplementary Fig. S2).  
179 This enabled us to detect cross contamination between samples as growth in our soil and liquid  
180 media controls. This was inferred from non-zero respiration measurements and the recovery of  
181 gDNA from liquid media (gDNA was always present in sterile soil). The cross contamination  
182 was first observed at week-5 (Supplemental Figure S2). The most common OTU identified from  
183 the controls was of the genus *Pseudomonas*. This OTU was present in the native soil and chitin  
184 enrichments, indicating that it was intrinsic to the experiential system and native to the parent  
185 microbiome (Supplemental Figure S3). Although the sterile controls lacked any viable growth at  
186 the onset of the incubations (as determined by plate counting), the *Pseudomonas* OTU  
187 introduced during the incubations was able to grow and dominate the liquid sterile controls as  
188 well as the more dilute liquid samples ( $10^{-3}$  and  $10^{-4}$ ). However, although present, the  
189 *Pseudomonas* OTU did not establish itself to high relative levels within the higher richness liquid  
190 samples or any of the soil samples, likely due to the complexity and stability of the existing  
191 microbial communities already present in these sites.

192 We anticipated that long-term selection by NAG in a sterile soil or liquid M9  
193 environment would result in soil microbial consortia with reduced complexity as compared to

194 both the native soil microbiome and the chitin enriched soil microbiome. Over all, this was found  
195 to be true although the initial species richness of the inoculum also played a major role. We  
196 manually reduced the complexity of the inoculum by controlling the initial species-richness  
197 through dilutions. A comparison of the species-richness measured on the first sampling date  
198 (week-0) across dilutions in NAG enriched liquid media showed that the dilutions were  
199 successful in reducing the richness of the initial inoculum (Fig. 1C and Supplemental Table S1).  
200 It is very likely that a corresponding initial drop in richness was also happening with the soil  
201 dilutions, although this could not be confirmed by amplicon analysis due to DNA amplification  
202 from soil microbes that were likely killed during the gamma irradiation process (33, 34). In the  
203 liquid incubations, the observed 16S and ITS OTU counts from the  $10^{-3}$  and  $10^{-4}$  dilutions  
204 gradually decreased over time; however, the  $10^{-1}$  and  $10^{-2}$  dilutions revealed sharp decreases in  
205 species richness on the first week, followed by a rebounding trend through week-15. This drop  
206 and rebounding effect after week-3 was also observed across all of the dilutions associated with  
207 the NAG enriched soil. Fungal richness measurements followed similar patterns as those seen for  
208 the bacterial richness. By the end of 15-weeks the NAG enriched soil microbiome richness was  
209 reduced by approximately 35-70% (depending on dilution) compared to the original native soil  
210 (Fig. 1 C, D) and the NAG enriched liquid microbiome richness was reduced by approximately  
211 37-88%. This represents a considerable decrease in species complexity from the initial native and  
212 chitin-enriched soil microbiomes and a demonstration that a combination of dilution and long-  
213 term selection on specific carbon sources can lead to consortia with reduced species complexity.  
214  
215 **Physical environment and initial species richness influences stability.** The stability of the  
216 enriched consortia was measured by comparing beta diversity over time. Specifically, we used

217 measures of weighted UniFrac distance (35) between samples that occurred sequentially as a  
218 measure of phylogenetic volatility (Fig. 2), where consortia with lower volatility are defined as  
219 those showing a more similar community structure from one time point to the next (36). This  
220 represents a way to measure how much the community is changing from week-to-week, which is  
221 related to the taxonomic compositional stability over time (Supplemental Figure S4). By using  
222 this metric, it was clear that while enrichment on both NAG containing soil and liquid media led  
223 to stable consortia, those enriched within the liquid environment became relatively stable more  
224 quickly as compared to those in the enriched soil (Fig. 2). Consortial stability also depended on  
225 the complexity of the initial inoculum (Supplemental Table S2) (Fig. 2), a factor that was  
226 controlled by dilution of the chitin enriched input soil. Samples inoculated with the  $10^{-4}$  dilution  
227 (lowest initial richness) showed the greatest tendency to stabilize.

228         The consortia became more stable starting at week-5 with the maximum stability reached  
229 by the end of the experiment on week-15. However, differences were observed based on  
230 succession in liquid versus soil environments. The NAG enriched soil microbial communities  
231 showed an initial drop in volatility (weeks 1 – 2) followed by a rise in volatility through weeks 3  
232 – 5 (Fig 2). After 5-weeks of enrichment in soil with NAG, the composition of the soil  
233 microbiome did not change significantly (Fig. 2) and volatility continued to drop as the  
234 experiment progressed. In contrast, NAG enriched liquid microbiomes initially exhibited an  
235 extreme drop in volatility over the first two weeks and thereafter showed either a consistent  
236 volatility measurement near 0.10 (dilutions  $10^{-3}$  and  $10^{-4}$ ) or a continual gradual drop in volatility  
237 over the remaining 13-weeks down to a minimum of 0.15 (dilutions  $10^{-1}$  and  $10^{-2}$ ). Bacterial  
238 volatility showed a consistent increase around near week-11, which also corresponded with the  
239 observed decreases in the relative abundance of OTUs assigned as *Verrucomicrobia* and

240 *Bacteroidetes* in the soil consortia (Fig. 1). More diverse microbial communities were enriched  
241 and stabilized in soil as compared to the liquid incubations. This demonstrates that the physical  
242 environment was a significant factor for the stability and compositional convergence of  
243 microbial consortia. These results show that the final stability of the consortia and the extent of  
244 species richness were directed by the length of succession, initial richness and culturing  
245 environment.

246  
247 **Biological and physical variables underpinning observed beta diversity.** Respiration and  
248 volatility of the enriched communities were compared to phylogenetic composition over time via  
249 ordination by canonical analysis of principal coordinates using weighted Unifrac distance  
250 between rarefied samples (Fig. 3). As described earlier, changes (volatility) in community  
251 composition between time points were measured as the weighted UniFrac distance between  
252 subsequent time points (Fig. 2). In all environments, the volatility vector points were in the  
253 direction of early stage incubation samples (Fig. 3), where large changes in the community  
254 structure occurred between time points (Supplemental Figure S4). In liquid media incubations,  
255 the contribution of respiration for the dissimilarity between samples become more prominent in  
256 the later stages of incubation time courses. The dominant phyla from both kingdoms were  
257 assessed with respect to incubation time and treatment condition. In the soil, *Proteobacteria* and  
258 *Firmicutes* co-varied with volatility (Fig. 3A), as they were most abundant in the volatile initial  
259 samples and slowly decreased over time. However, in the liquid media *Firmicutes* and  
260 *Bacteroidetes* were closely aligned with volatility (Fig. 3B). Also, *Proteobacteria* became  
261 dominant over time in the liquid media incubations; in particular those that were originally  
262 inoculated with higher dilutions of the chitin-enrichment that had a lower initial species richness.

263 For the fungi in the soil culture, volatility co-varied primarily with *Mortierellomycota* and  
264 *Chytridiomycota*, motile saprotrophs with chitin-containing cell walls that are found in wet soils  
265 (Fig. 3C) (37).

266

267

## 268 **DISCUSSION**

269 Selective enrichment of soil microbes with specific carbon substrates resulted in the formation  
270 of distinct microbial consortia that displayed reduced complexity. Those consortia that developed  
271 in NAG enriched soil were also representative of the native soil microbiome used as the  
272 inoculum. A primary finding from this study was that the initial species richness influenced  
273 successional patterns that were enriched with a specific carbon/nitrogen source in both NAG  
274 enriched liquid media and soil incubations. Because the experiment was well replicated (8  
275 biological replicates per treatment) we also confirmed our hypothesis that substrate-driven soil  
276 community succession is deterministic in that all of the replicates for a given soil dilution  
277 resulted in similar endpoint communities (Supplemental Figure S4 and Table S3). This result  
278 was observed in both liquid media and soil substrates, although the taxonomic structure of  
279 endpoint consortia was controlled by hydro-physical and other matrix-associated differences  
280 between soil and liquid media. The end-point microbial community structure was well explained  
281 by the initial dilution condition and this influence was more pronounced on the liquid than the  
282 soil treatment condition (Supplemental Table S2). At the end of the enrichment period, the soil  
283 NAG enrichments showed higher species richness compared to equivalent liquid treatments,  
284 despite having identical inoculations, and were also more representative of microbiomes from  
285 the original native soil with respect to community composition. The persistence of members of

286 the original soil microbiome was consistent across dilutions for the NAG enriched soil. The  $10^{-1}$   
287 dilution had the highest species similarity to the native soil and retained a diverse community,  
288 while, at the other extreme, the  $10^{-4}$  dilution represented a much simpler, less rich community.

289 This approach for developing consortia with reduced complexity is of interest as a  
290 method for obtaining simplified model microbiomes, with naturally interacting members that are  
291 representative of the native soil system. This similarity to the native soil seen with the NAG  
292 enriched soil is likely a result of the experiment being performed with soil microbes in their  
293 natural soil substrate, compared to a relatively foreign substrate (liquid). Another recent study  
294 also examined shorter term succession of soil microbiomes in liquid (but not soil) and found that  
295 soil microbiomes enriched on liquid media are very different from the original source soil  
296 microbiome (38). That study was carried out using a variety of carbon sources resulting in  
297 microbiomes with reduced complexity, similar to what we show here. Together, these studies  
298 confirm that reduced complexity consortia that have community membership representative of  
299 soil microbiomes are much more likely to be obtained using a soil-based enrichment compared to  
300 a liquid-based enrichment. In addition, our results clearly show differences in the successional  
301 dynamics and end-point structures of each consortium with respect to their initial species  
302 richness based on the dilution of the chitin enriched soil inoculum.

303 We found that the richness of the initial soil inoculum strongly impacted the alpha  
304 diversity of the resulting microbial consortia over time (Fig. 1). These results support our  
305 hypothesis that the initial species richness would influence each consortium's tendency to  
306 converge towards smaller changes in community structure between successive time points.  
307 Results supporting this hypothesis were observed for the higher dilutions ( $10^{-3}$  and  $10^{-4}$ ) for all  
308 treatments and measurements (Fig. 2). Each consortium's tendency to converge towards smaller

309 changes in community structure between successive time points was assessed by comparing  
310 weighted UniFrac distances between time points and was notably strongest for communities  
311 developed in the liquid media and measured by 16S rRNA sequencing as compared to ITS. The  
312 generalizability of this stability convergence effect is partially supported through similar findings  
313 presented by Shade et al (2014), who showed how rare taxa significantly influence microbial  
314 diversity (39). Dilutions are more likely to remove rare taxa and therefore our results provide  
315 some additional quantification of the effect presented by Shade et al. (2014). However, in our  
316 current study, we cannot fully decouple the effects of reduced initial richness from reduced  
317 counts of viable cells that were almost certainly created from the dilution procedure. Hence, an  
318 alternative interpretation could be formulated as decreased viable cell numbers in early stages of  
319 succession lead to decreased species richness and higher tendencies to converge towards smaller  
320 changes in community structure between successive time points.

321 Both bacterial and fungal populations were selected during the chitin/NAG incubation  
322 process. This suggests that the representative populations were able to either metabolize, or  
323 through some other means take advantage of the added substrates. Specifically, we found that  
324 members of the *Acidobacteria*, *Actinobacteria*, *Bacteroidetes*, *Chloroflexi*, *Firmicutes*,  
325 *Gemmatimonadetes*, *Planctomycetes*, *Proteobacteria*, *Verrucomicrobia* were represented in the  
326 NAG incubations (Fig. 1a). In addition, the richness of *Verrucomicrobia*, *Bacteroidetes* and  
327 *Planctomycetes* increased in soil incubated with NAG compared to native soil (Fig. 1a).  
328 Representatives of these phyla were also detected on a previous study of soil enriched with chitin  
329 (12). With respect to the fungi, we found that the *Mortierellomycota* phylum increased in relative  
330 abundance in the NAG enriched consortia (Fig. 1b). *Mortierellomycota* are members of the  
331 Mucoromyceta, based on recent fungal taxonomy (40). They are sporangiferous, generally

332 saprotrophic, including being able to grow on other fungi, and are found in soil (41). The  
333 dominance of these specific bacteria and fungi suggests that their enrichment came due to their  
334 ability to use either chitin/NAG or its metabolic byproduct as a substrate.

335         The occurrence of enriched, stable consortia with dozens to hundreds of members, found  
336 here and in a similar study by Goldfarb, et. al. (42), as opposed to selection of a monoculture,  
337 suggests that the compositions of the reduced microbial communities are governed by cross-  
338 feeding interactions among microbes. In our longer-term soil incubations with NAG the  
339 microbiome converged into a less complex microbial community compared to that found in the  
340 native soil. This is consistent with the results of the Goldfarb study, which also enriched a  
341 simplified microbial community, derived from soil, on single carbon sources. However, unlike  
342 the previous study, which used only liquid, we enriched on both liquid and soil and found that  
343 enrichments on soil led to a reduced complexity community that is far more representative of the  
344 native soil microbiome compared to enrichment on liquid. There are several reasons why  
345 structured environments may better facilitate and stabilize social interactions, including the  
346 limited dispersal of interacting species, and the physical retention of resources within the soil  
347 matrix. The close physical proximity of members of soil consortia in discrete niches would thus  
348 facilitate social activities between member populations (e.g. exchange of public goods, quorum  
349 sensing and competition). When microbial communities have a single major carbon source only  
350 a subset of the community will have the metabolic capability to utilize it as a substrate. For  
351 complex substrates, such as chitin, other species will be reliant on primary species to degrade the  
352 polymer to simpler compounds, thus selecting for a community that interacts by metabolic cross-  
353 feeding, interactions that positively affect both the primary degrading species and the secondary  
354 degrading species (43, 44). Positive metabolic interactions between microorganisms residing



355 within communities have been studied in other systems as well; particularly in biofilms where  
356 species and cells are in very close proximity and must cooperate for growth (45).

357         Because we monitored the soil enrichments over a relatively long time period, we could  
358 determine the time required for the soil microbiomes to reach stable community memberships.  
359 Stability was achieved surprisingly rapidly (3 – 5 weeks) and the resulting consortia remained  
360 stable over several months. Importantly, the development of stable, reduced complexity,  
361 naturally interacting consortia from native soil can provide representative model soil  
362 communities for future studies to study the mechanisms underlying species interactions. This  
363 valuable resource should enable deciphering of the molecular signaling mechanisms and  
364 metabolic interactions used by soil community members to decompose complex carbon  
365 substrates in soil. In addition, the information can be used to enhance *in silico* models of soil  
366 microbial community interactions that can be used to predict how key taxa and traits can be  
367 perturbed by environmental change.

368

369 **Conclusions.** Here we demonstrated that the succession of microbial communities derived from  
370 chitin/NAG enriched soil microbiome is strongly influenced by the initial soil microbiome  
371 richness and the hydro-physical environment. The initial species richness, which is a proxy for  
372 the complexity of a microbiome, at least partially controlled the tendency for a soil-sourced  
373 consortium to stabilize and maintain a relatively constant community structure over time.  
374 Additionally, the long-term soil enrichments resulted in a reduced complexity representation of  
375 the initial soil microbiome diversity and richness. The results of this study inform how soil  
376 microbial communities are shaped during succession and how a combination of the initial

377 taxonomic structure and physical environment influences the tendency for a community to  
378 stabilize over time.

379

## 380 **MATERIALS AND METHODS**

381 **Field sampling and chitin enrichment.** Soil was collected in October 2017 from a field site  
382 operated by Washington State University, located in Prosser, Washington State USA  
383 (46°15'04"N and 119°43' 43"W) site. The soil represents a Warden silt loam that is  
384 characterized as a coarse-silty, mixed, superactive and mesic Xeric Haplocambid. The soil  
385 represents a marginal soil with low organic matter content (3.7%) and pH = 8. All soil samples  
386 were collected in three field replicates. At each site, bulk sampling was accomplished with a  
387 shovel within 0 to 20 cm depth from the ground and it was stored in plastic bags at 4°C. To  
388 exclude bigger soil aggregates and rocks, samples were sieved with 4 mm mesh size. For each of  
389 the three field blocks, three homogeneous replicates of 150 g soil were weighed out in to a 250  
390 ml sterile screwcap bottles. To enrich chitin degrading members of the microbial community,  
391 samples were incubated for six weeks in soil augmented with chitin (*Poly-(1→4)-β-N-acetyl-D-*  
392 *glucosamine*, Sigma-Aldrich, St. Louis, MO, USA) at different concentrations (0, 10, 50,100 µg  
393 chitin/g soil dry weight). Chitin was mixed and evenly distributed within the soil, and sterile  
394 water was added to reflect a 24% field water capacity. Samples were kept in the dark at 20°C.  
395 Additionally, 1 g of sample was harvested weekly from each bottle and stored in -80°C for 16S  
396 and ITS amplicon analysis.

397

398 **Gamma irradiated soil.** Prosser soil was sterilized with gamma irradiation at 85 kGy additional  
399 in two successive applications of or 25 kGy, followed by 60 kGy. Initially, 3000 curie Co-60

400 source was used in the collimated open beam irradiator. For the second irradiation, 1300 curie  
401 Co-60 source was used in the Gamma Bunker, which is a 1.5 ft.<sup>3</sup> closed chamber irradiator (46,  
402 47). Sterility of soil was confirmed by plating of several serial dilutions on LB agar plates  
403 followed by incubation at 30 °C and the lack of growth.

404  
405 **Sterile soil incubations and liquid controls.** M9 minimal media and sterile liquid soil extract  
406 were prepared as described by Sambrook and Russell (2001) (48) and method of soil analysis-  
407 microbiological and biochemical properties (49), respectively. *N-acetyl glucosamine* (NAG)  
408 (Sigma-Aldrich, St. Louis, MO, USA) was added into the M9 media to 100 µg/ml. Ten milliliter  
409 liquid cultures were setup in 25 ml sterile glass tubes in four successive 10-fold serial dilutions.  
410 First, 1 g of actively respiring chitinolytic enriched soil (100 µg chitin/g soil dry weight) was  
411 inoculated into the first glass tubes with 9 mL of the M9 media (representing the 10<sup>-1</sup> dilution)  
412 and vortexed for 30 seconds. This solution then was used for the subsequent serial dilutions.  
413 Uninoculated controls were also generated and incubated with the dilution samples. Each serial  
414 dilution and respective controls were performed in 8 biological replicates. Incubation was  
415 performed in the dark at 20 °C, shaking at 130 RPM. CO<sub>2</sub> respiration was measured aseptically  
416 three times a week. Headspace was aseptically flushed with air after each sample to prevent  
417 anaerobic conditions. Additionally, 1 ml of sample was harvested weekly for the first three  
418 weeks, followed by biweekly sampling and stored in -80 °C for 16S and ITS amplicon analysis.  
419 After each sampling period, substrate and moisture levels were refreshed by adding 1 ml of M9  
420 medium.

421 The soil enrichments were set up using 5.5 g gamma- irradiated soil in 15ml sterile tubes  
422 in parallel with their liquid counterparts. The “sterile soil” treatments were prepared by 1 ml soil

423 extract liquid enriched with 100 ppm NAG to each tube containing sterile soil. The soil samples  
424 were briefly mixed with a sterile spatula and pre-incubated in the dark at 20°C for two days.  
425 After pre-incubation, 0.5 ml inoculum was taken from the liquid serial dilution described above  
426 and added to the counterpart sterile soil tubes. The soil enrichments were sealed with filter screw  
427 caps (CellTreat, non-pyrogenic and sterilized by gamma irradiation, China) to allow continuous  
428 air flow. Each 0.3 g sample was harvested weekly for the first three weeks, followed by biweekly  
429 sampling and stored at -80 °C for downstream molecular measurements.

430  
431 **Amplicon sequencing.** Total DNA was extracted using the MoBio PowerSoil DNA isolation kit  
432 (Qiagen, Carlsbad, CA) in accordance with the Earth Microbiome Project (EMP) protocols (50).  
433 Sequencing was performed on an Illumina MiSeq instrument (Illumina, San Diego, CA).  
434 Triplicate, separate 16S and ITS rRNA gene amplification reactions were performed on DNA  
435 from each extraction. The 16S primers targeted the V4 hypervariable region of the 16S SSU  
436 rRNA gene using the V4 forward primer (515F) and V4 reverse primer (806R) with 0–3 random  
437 bases and the Illumina sequencing primer binding site (51). The ITS primers targeted the ITS1  
438 region using the ITS1f and ITS2 primers (52).

439  
440 **Amplicon analysis.** The Hundo (2017) amplicon processing protocol was used to process 16S  
441 and ITS amplicons (53). In brief, sequences were trimmed and filtered of adapters and  
442 contaminants using BBDuk2 of the BBTools (‘Tools’) package. VSEARCH (54) was used to  
443 merge, filter to an expected error rate of 1, dereplicate, and remove singletons before  
444 preclustering reads for *de novo* and reference-based chimera checking. Reads were clustered into  
445 OTUs at 97% similarity and an OTU table in the BIOM format (55) was constructed by mapping

446 filtered reads back to these clusters. BLAST+ (56) is used to align OTU sequences to the  
447 database curated by CREST (57) (SILVA v128 for 16S, UNITE v7 for ITS) and taxonomy was  
448 assigned based on the CREST LCA method. Multiple sequence alignment was performed with  
449 Clustal Omega (58) and a phylogenetic tree was constructed using FastTree2 (59).

450

451 **Diversity analysis.** Downstream analysis was completed in R (60), using the phyloseq (61) and  
452 vegan packages (62). To preserve the maximum consistency within each replicate, samples were  
453 rarified to an even depth of 2,000 reads per sample. The observed counts of unique OTUs  
454 (species-richness) and Simpson's Evenness were used to characterize alpha diversity (63). In  
455 order to assess microbial stability/volatility over time, we implemented the volatility analysis as  
456 previously described (36), in which the amount the community change between successive time  
457 points was measured with weighted UniFrac distances.

458

459 **Data repository and reproducible analyses.** Genetic sequencing data is available on the Open  
460 Science Framework (osf.io) for both 16S and 1TS amplicons as part of this project:  
461 <https://osf.io/6d5kz/>, along with the Rmarkdown processing scripts used to process the data and  
462 build annotated feature abundance tables and phylogenetic tree using Hundo.

463

#### 464 **ACKNOWLEDGMENT**

465 This research was supported by the Department of Energy Office of Biological and  
466 Environmental Research (BER) and is a contribution of the Scientific Focus Area 'Phenotypic  
467 response of the soil microbiome to environmental perturbations' (70880). PNNL is operated for  
468 the DOE by Battelle Memorial Institute under Contract DE-AC05-76RLO1830.

469

## 470 REFERENCES CITED

- 471 1. Barrios E. 2007. Soil biota, ecosystem services and land productivity. *ECOL ECON*  
472 64:269-285.
- 473 2. Thompson LR, Sanders JG, McDonald D, Amir A, Ladau J, Locey KJ, Prill RJ, Tripathi  
474 A, Gibbons SM, Ackermann G. 2017. A communal catalogue reveals Earth's multiscale  
475 microbial diversity. *Nature* 551.
- 476 3. Ramette A, Tiedje JM. 2007. Multiscale responses of microbial life to spatial distance  
477 and environmental heterogeneity in a patchy ecosystem. *P NATL ACAD SCI USA*  
478 104:2761-2766.
- 479 4. Bender SF, Wagg C, van der Heijden MG. 2016. An underground revolution:  
480 biodiversity and soil ecological engineering for agricultural sustainability. *TRENDS*  
481 *ECOL EVOL* 31:440-452.
- 482 5. Gougoulias C, Clark JM, Shaw LJ. 2014. The role of soil microbes in the global carbon  
483 cycle: tracking the below-ground microbial processing of plant-derived carbon for  
484 manipulating carbon dynamics in agricultural systems. *J SCI FOOD AGR* 94:2362-2371.
- 485 6. Liang C, Jesus EdC, Duncan DS, Jackson RD, Tiedje JM, Balser TC. 2012. Soil  
486 microbial communities under model biofuel cropping systems in southern Wisconsin,  
487 USA: Impact of crop species and soil properties. *APPL SOIL ECOL* 54:24-31.
- 488 7. Roberts WK, Selitrennikoff CP. 1988. Plant and bacterial chitinases differ in antifungal  
489 activity. *MICROBIOLOGY+* 134:169-176.
- 490 8. Kumar MNR. 2000. A review of chitin and chitosan applications. *REACT FUNCT*  
491 *POLYM* 46:1-27.
- 492 9. Brzezinska MS, Jankiewicz U, Burkowska A, Walczak M. 2014. Chitinolytic  
493 microorganisms and their possible application in environmental protection. *CURR*  
494 *MICROBIOL* 68:71-81.
- 495 10. Andersson M, Kjølner A, Struwe S. 2004. Microbial enzyme activities in leaf litter,  
496 humus and mineral soil layers of European forests. *SOIL BIOL BIOCHEM* 36:1527-  
497 1537.
- 498 11. Beier S, Bertilsson S. 2013. Bacterial chitin degradation—mechanisms and  
499 ecophysiological strategies. *FRONT MICROBIOL* 4:149.
- 500 12. Jacquiod S, Franqueville L, Cécillon S, Vogel TM, Simonet P. 2013. Soil bacterial  
501 community shifts after chitin enrichment: an integrative metagenomic approach. *PLoS*  
502 *One* 8:e79699.
- 503 13. Debode J, De Tender C, Soltaninejad S, Van Malderghem C, Haegeman A, Van der  
504 Linden I, Cottyn B, Heyndrickx M, Maes M. 2016. Chitin mixed in potting soil alters  
505 lettuce growth, the survival of zoonotic bacteria on the leaves and associated rhizosphere  
506 microbiology. *FRONT MICROBIOL* 7:565.
- 507 14. Kaštovská K, Elster J, Stibal M, Šantrůčková H. 2005. Microbial assemblages in soil  
508 microbial succession after glacial retreat in Svalbard (High Arctic). *MICROBIAL ECOL*  
509 50:396.
- 510 15. Ohtonen R, Fritze H, Pennanen T, Jumpponen A, Trappe J. 1999. Ecosystem properties  
511 and microbial community changes in primary succession on a glacier forefront.  
512 *Oecologia* 119:239-246.

- 513 16. Nemergut DR, Anderson SP, Cleveland CC, Martin AP, Miller AE, Seimon A, Schmidt  
514 SK. 2007. Microbial community succession in an unvegetated, recently deglaciated soil.  
515 MICROBIAL ECOL 53:110-122.
- 516 17. Schmidt S, Reed SC, Nemergut DR, Grandy AS, Cleveland CC, Weintraub MN, Hill  
517 AW, Costello EK, Meyer A, Neff J. 2008. The earliest stages of ecosystem succession in  
518 high-elevation (5000 metres above sea level), recently deglaciated soils. P ROY SOC  
519 LOND B BIO 275:2793-2802.
- 520 18. Brown SP, Jumpponen A. 2014. Contrasting primary successional trajectories of fungi  
521 and bacteria in retreating glacier soils. MOL ECOL 23:481-497.
- 522 19. Knelman JE, Schmidt SK, Lynch RC, Darcy JL, Castle SC, Cleveland CC, Nemergut  
523 DR. 2014. Nutrient addition dramatically accelerates microbial community succession.  
524 PloS one 9:e102609.
- 525 20. Bernstein HC, Brislawn CJ, Dana K, Flores-Wentz T, Cory AB, Fansler SJ, Fredrickson  
526 JK, Moran JJ. 2017. Primary and heterotrophic productivity relate to multikingdom  
527 diversity in a hypersaline mat. FEMS Micro Ecol 93:fix121.
- 528 21. Brislawn CJ, Graham EB, Dana K, Ihardt P, Fansler SJ, Chirlser WB, Cliff JB, Stegen  
529 JC, Moran JJ, Bernstein HC. 2018. Forfeiting the founder effect: turnover defines biofilm  
530 community succession. bioRxiv:282574.
- 531 22. Deiglmayr K, Philippot L, Tschirko D, Kandeler E. 2006. Microbial succession of  
532 nitrate-reducing bacteria in the rhizosphere of *Poa alpina* across a glacier foreland in the  
533 Central Alps. ENVIRON MICROBIOL 8:1600-1612.
- 534 23. Jangid K, Whitman WB, Condon LM, Turner BL, Williams MA. 2013. Soil bacterial  
535 community succession during long-term ecosystem development. MOL ECOL 22:3415-  
536 3424.
- 537 24. Knelman JE, Graham EB, Prev y JS, Robeson MS, Kelly P, Hood E, Schmidt SK. 2018.  
538 Interspecific Plant Interactions Reflected in Soil Bacterial Community Structure and  
539 Nitrogen Cycling in Primary Succession. FRONT MICROBIOL 9:128.
- 540 25. Brockett BF, Prescott CE, Grayston SJ. 2012. Soil moisture is the major factor  
541 influencing microbial community structure and enzyme activities across seven  
542 biogeoclimatic zones in western Canada. Soil Biology and Biochemistry 44:9-20.
- 543 26. Bouskill NJ, Wood TE, Baran R, Ye Z, Bowen BP, Lim H, Zhou J, Nostrand JDV, Nico  
544 P, Northen TR. 2016. Belowground response to drought in a tropical forest soil. I.  
545 Changes in microbial functional potential and metabolism. Frontiers in microbiology  
546 7:525.
- 547 27.  ov cek A, Kim M, Or D, Gillor O. 2017. Microbial community response to hydration-  
548 desiccation cycles in desert soil. Scientific reports 7:45735.
- 549 28. De Vries FT, Shade A. 2013. Controls on soil microbial community stability under  
550 climate change. FRONT MICROBIOL 4:265.
- 551 29. Shade A, Peter H, Allison SD, Baho D, Berga M, B rgmann H, Huber DH, Langenheder  
552 S, Lennon JT, Martiny JB. 2012. Fundamentals of microbial community resistance and  
553 resilience. FRONT MICROBIOL 3:417.
- 554 30. Shade A, Caporaso JG, Handelsman J, Knight R, Fierer N. 2013. A meta-analysis of  
555 changes in bacterial and archaeal communities with time. ISME J 7:1493.
- 556 31. Allison SD, Martiny JB. 2008. Resistance, resilience, and redundancy in microbial  
557 communities. P NATL ACAD SCI USA 105:11512-11519.

- 558 32. Castle SC, Nemergut DR, Grandy AS, Leff JW, Graham EB, Hood E, Schmidt SK,  
559 Wickings K, Cleveland CC. 2016. Biogeochemical drivers of microbial community  
560 convergence across actively retreating glaciers. *SOIL BIOL BIOCHEM* 101:74-84.
- 561 33. Carini P, Marsden PJ, Leff JW, Morgan EE, Strickland MS, Fierer N. 2017. Relic DNA  
562 is abundant in soil and obscures estimates of soil microbial diversity. *NAT MICROBIOL*  
563 2:16242.
- 564 34. Lennon J, Muscarella M, Placella S, Lehmkuhl B. 2018. How, When, and Where Relic  
565 DNA Affects Microbial Diversity. *mBio* 9:e00637-18.
- 566 35. Hamady M, Lozupone C, Knight R. 2010. Fast UniFrac: facilitating high-throughput  
567 phylogenetic analyses of microbial communities including analysis of pyrosequencing  
568 and PhyloChip data. *ISME J* 4:17.
- 569 36. Halfvarson J, Brislawn CJ, Lamendella R, Vázquez-Baeza Y, Walters WA, Bramer LM,  
570 D'Amato M, Bonfiglio F, McDonald D, Gonzalez A. 2017. Dynamics of the human gut  
571 microbiome in inflammatory bowel disease. *NAT MICROBIOL* 2:17004.
- 572 37. Freeman K, Martin A, Karki D, Lynch R, Mitter M, Meyer A, Longcore J, Simmons D,  
573 Schmidt S. 2009. Evidence that chytrids dominate fungal communities in high-elevation  
574 soils. *P NATL ACAD SCI USA*:pnas. 0907303106.
- 575 38. Zhou J, Deng Y, Zhang P, Xue K, Liang Y, Van Nostrand JD, Yang Y, He Z, Wu L,  
576 Stahl DA. 2014. Stochasticity, succession, and environmental perturbations in a fluidic  
577 ecosystem. *P NATL ACAD SCI USA*:201324044.
- 578 39. Shade A, Jones SE, Caporaso JG, Handelsman J, Knight R, Fierer N, Gilbert JA. 2014.  
579 Conditionally rare taxa disproportionately contribute to temporal changes in microbial  
580 diversity. *MBio* 5:e01371-14.
- 581 40. Tedersoo L, Sánchez-Ramírez S, Kõljalg U, Bahram M, Döring M, Schigel D, May T,  
582 Ryberg M, Abarenkov K. 2018. High-level classification of the Fungi and a tool for  
583 evolutionary ecological analyses. *FUNGAL DIVERS* 90:135-159.
- 584 41. Hoffmann K, Voigt K, Kirk P. 2011. Mortierellomycotina subphyl. nov., based on multi-  
585 gene genealogies. *Mycotaxon* 115:353-363.
- 586 42. Goldford JE, Lu N, Bajić D, Estrela S, Tikhonov M, Sanchez-Gorostiaga A, Segrè D,  
587 Mehta P, Sanchez A. 2018. Emergent simplicity in microbial community assembly.  
588 *Science* 361:469-474.
- 589 43. Esperschütz J, Pérez-de-Mora A, Schreiner K, Welzl G, Buegger F, Zeyer J, Hagedorn F,  
590 Munch J, Schlöter M. 2011. Microbial food web dynamics along a soil chronosequence  
591 of a glacier forefield. *Biogeosciences* 8:3283-3294.
- 592 44. Kramer S, Dibbern D, Moll J, Huenninghaus M, Koller R, Krueger D, Marhan S, Urich  
593 T, Wubet T, Bonkowski M. 2016. Resource partitioning between bacteria, fungi, and  
594 protists in the detritusphere of an agricultural soil. *FRONT MICROBIOL* 7:1524.
- 595 45. Ren D, Madsen JS, Sørensen SJ, Burmølle M. 2015. High prevalence of biofilm synergy  
596 among bacterial soil isolates in cocultures indicates bacterial interspecific cooperation.  
597 *ISME J* 9:81.
- 598 46. Ražem D, Katušin-Ražem B. 2002. Dose requirements for microbial decontamination of  
599 botanical materials by irradiation. *RADIAT PHYS CHEM* 63:697-701.
- 600 47. Tallentire A, Miller A, Helt-Hansen J. 2010. A comparison of the microbicidal  
601 effectiveness of gamma rays and high and low energy electron radiations. *RADIAT*  
602 *PHYS CHEM* 79:701-704.



- 603 48. Sambrook J, Russell D. 2001. *Molecular cloning: a laboratory manual*. Cold Spring Harbor Laboratory Press. Cold Spring Harbor, NY.
- 604
- 605 49. R. W. Weaver SA, Peter Bottomley , David Bezdiecek, Scott Smith, Ali Tabatabai, Art Wollum, S. H. Mickelson , J. M. Bigham 1994. *Method of Soil Analysis, Microbiological and Biochemical Properties*
- 607
- 608 50. Gilbert JA, Meyer F, Antonopoulos D, Balaji P, Brown CT, Brown CT, Desai N, Eisen JA, Evers D, Field D. 2010. Meeting report: the terabase metagenomics workshop and the vision of an Earth microbiome project. *Stand Genomic Sci* 3:243.
- 609
- 610
- 611 51. Caporaso JG, Kuczynski J, Stombaugh J, Bittinger K, Bushman FD, Costello EK, Fierer N, Pena AG, Goodrich JK, Gordon JI. 2010. QIIME allows analysis of high-throughput community sequencing data. *Nat Methods* 7:335.
- 612
- 613
- 614 52. Walters W, Hyde ER, Berg-Lyons D, Ackermann G, Humphrey G, Parada A, Gilbert JA, Jansson JK, Caporaso JG, Fuhrman JA, Apprill A, Knight R. 2016. Improved bacterial 16S rRNA gene (V4 and V4-5) and fungal internal transcribed spacer marker gene primers for microbial community surveys. *Msystems* 1:e00009-15.
- 615
- 616
- 617
- 618 53. Brown J, Zavoshy N, Brislawn CJ, McCue LA. 2018. Hundo: a Snakemake workflow for microbial community sequence data. *PeerJ Preprints*,
- 619
- 620 54. Rognes T, Flouri T, Nichols B, Quince C, Mahé F. 2016. VSEARCH: a versatile open source tool for metagenomics. *PeerJ* 4:e2584.
- 621
- 622 55. McDonald D, Clemente JC, Kuczynski J, Rideout JR, Stombaugh J, Wendel D, Wilke A, Huse S, Hufnagle J, Meyer F. 2012. The Biological Observation Matrix (BIOM) format or: how I learned to stop worrying and love the ome-ome. *GigaScience* 1:7.
- 623
- 624
- 625 56. Camacho C, Coulouris G, Avagyan V, Ma N, Papadopoulos J, Bealer K, Madden TL. 2009. BLAST+: architecture and applications. *BMC bioinformatics* 10:421.
- 626
- 627 57. Lanzén A, Jørgensen SL, Huson DH, Gorfer M, Grindhaug SH, Jonassen I, Øvreås L, Urich T. 2012. CREST—classification resources for environmental sequence tags. *PloS one* 7:e49334.
- 628
- 629
- 630 58. Sievers F, Higgins DG. 2014. Clustal Omega, accurate alignment of very large numbers of sequences, p 105-116, *Multiple sequence alignment methods*. Springer.
- 631
- 632 59. Price MN, Dehal PS, Arkin AP. 2010. FastTree 2—approximately maximum-likelihood trees for large alignments. *PloS one* 5:e9490.
- 633
- 634 60. Team RC. 2000. R language definition. Vienna, Austria: R foundation for statistical computing.
- 635
- 636 61. McMurdie PJ, Holmes S. 2013. phyloseq: an R package for reproducible interactive analysis and graphics of microbiome census data. *PloS one* 8:e61217.
- 637
- 638 62. Oksanen J, Blanchet FG, Kindt R, Legendre P, Minchin PR, O’hara R, Simpson GL, Solymos P, Stevens MHH, Wagner H. 2013. Package ‘vegan’. *Community ecology package, version 2*.
- 639
- 640
- 641 63. Hamady M, Lozupone C, Knight R. 2010. Fast UniFrac: facilitating high-throughput phylogenetic analyses of microbial communities including analysis of pyrosequencing and PhyloChip data. *ISME J* 4:17.
- 642
- 643
- 644

646 **FIGURE LEGENDS**

647 **Figure 1:** The successional dynamics of microbial consortia. Differences in microbial  
648 community structure and alpha diversity are plotted with respect to native soil communities  
649 (labelled as 'n'), the 6-week chitin enriched communities (labelled as 'c'), uninoculated control  
650 (labelled as 'control') and different serial dilutions of NAG enrichment in liquid and soil  
651 treatments for 0-15 weeks. The results are partitioned by initial dilution and incubating  
652 conditions (NAG-enrichment in liquid on the top and soil in the bottom). The most abundant  
653 bacterial (A) and fungal (B) phyla are shown over the 15-week incubation. The alpha diversity of  
654 bacteria (C) and fungi (D) are estimated using species richness and Simpson's evenness.

655  
656 **Figure 2:** The influence of physical environment on taxonomic volatility – i.e., the tendency for  
657 the community to stabilize with respect to taxa being gained/lost over time. Each graph shows  
658 the weighted UniFrac distance for bacteria (A) and fungi (B) calculated between subsequent  
659 incubation times and plotted by weeks of incubation, dilution factor and treatment conditions.

660  
661 **Figure 3:** The biological and physical variables correlated with beta diversity. Ordinations  
662 present canonical analysis of principal coordinates (CAP) of weighted UniFrac distances  
663 between samples. The percent of variation captured by the vectors is shown on each axis. Each  
664 vector has a magnitude (length) and direction of a variable's contributions to the principle  
665 components. Vectors represent: respiration CO<sub>2</sub>/h (orange), volatility (red), and the most  
666 abundant phyla (purple).

667

668

669 **Supplemental Figure S1:** The most abundant bacterial (A) and fungal (B) phyla are plotted for  
670 the native soil (labelled as 'n') and the 6-week chitin enriched soil (labelled as 'c'). The alpha  
671 diversity of bacteria (C) and fungi (D) are estimated using species richness and Simpson's  
672 evenness.

673

674 **Supplemental Figure S2:** Rate of respiration varies over time based on dilution and physical  
675 environment. The respiration rate was plotted for both liquid (top) and soil (bottom) NAG  
676 enrichment cultures from weeks 2 through 7 to avoid the light spike in CO<sub>2</sub> released immediately  
677 after inoculation. Respiration was monitored three times a week with a PP Systems-EGM-4  
678 Environmental Gas Monitor (Amesbury, MA). The gas analyzer was setup in static mode to  
679 measure CO<sub>2</sub> and monitor respiration in each sample at periodic intervals. To measure CO<sub>2</sub>, a 10  
680 mL gas aliquot was taken from the incubation container using a sterile plastic syringe which has  
681 a control valve.

682

683 **Supplemental Figure S3:** Bacterial OTUs observed from 16S rRNA gene amplicon products in  
684 uninoculated controls. The most abundant OTUs shown in the controls were also found in the  
685 other samples.

686

687 **Supplemental Figure S4:** Patterns of variation within sample groups and within replicates.

688 A) Beta dispersion (within sample group variation) varies among time points as shown by the  
689 pairwise permutation test for homogeneity of multivariate dispersion at each time. Pairwise  
690 comparisons of the observed p-values are tabulated for both the 16S and ITS for liquid and soil

691 treatment conditions. B) A linear regression fit to the pairwise distance between replicates also  
692 shows changes in dispersion over time.

693

694 **Supplemental Table S1:** Final richness significantly varies between dilutions. Tukey's HSD test  
695 was performed to compare the richness between dilutions, and the p-values are shown here.

696

697 **Supplemental Table S2:** An initial time point species-richness in NAG enriched liquid media  
698 across all dilutions and control.

699

700 **Supplemental Table S3:** Community composition of final timepoints can be explained by initial  
701 dilution. On each set of endpoints, the adonis test was used to measure how much variation in  
702 weighted UniFrac distances between samples could be explained by the initial treatment ( $R^2$ ) and  
703 the probability that this level of similarity between endpoints would be seen by chance alone (p-  
704 value).

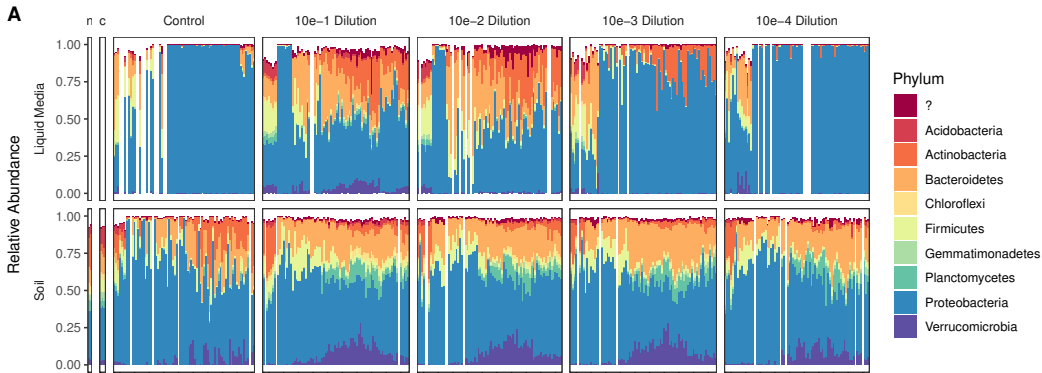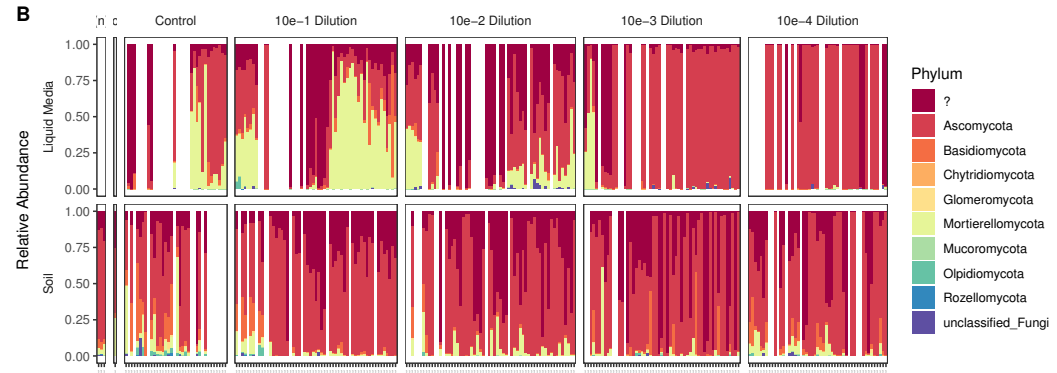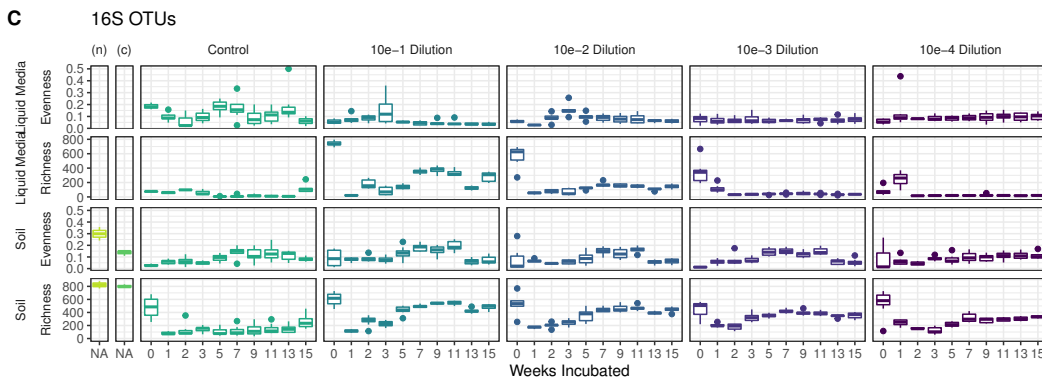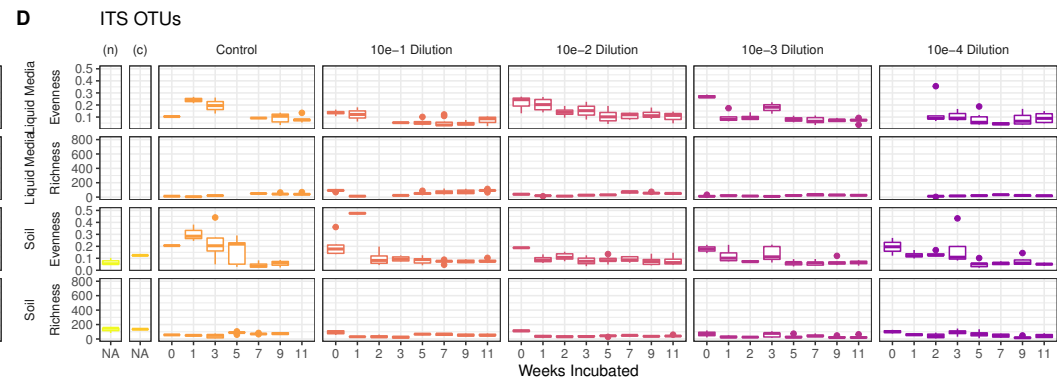

# **A** 16S: Weighted UniFrac Distances between subsequent timepoints

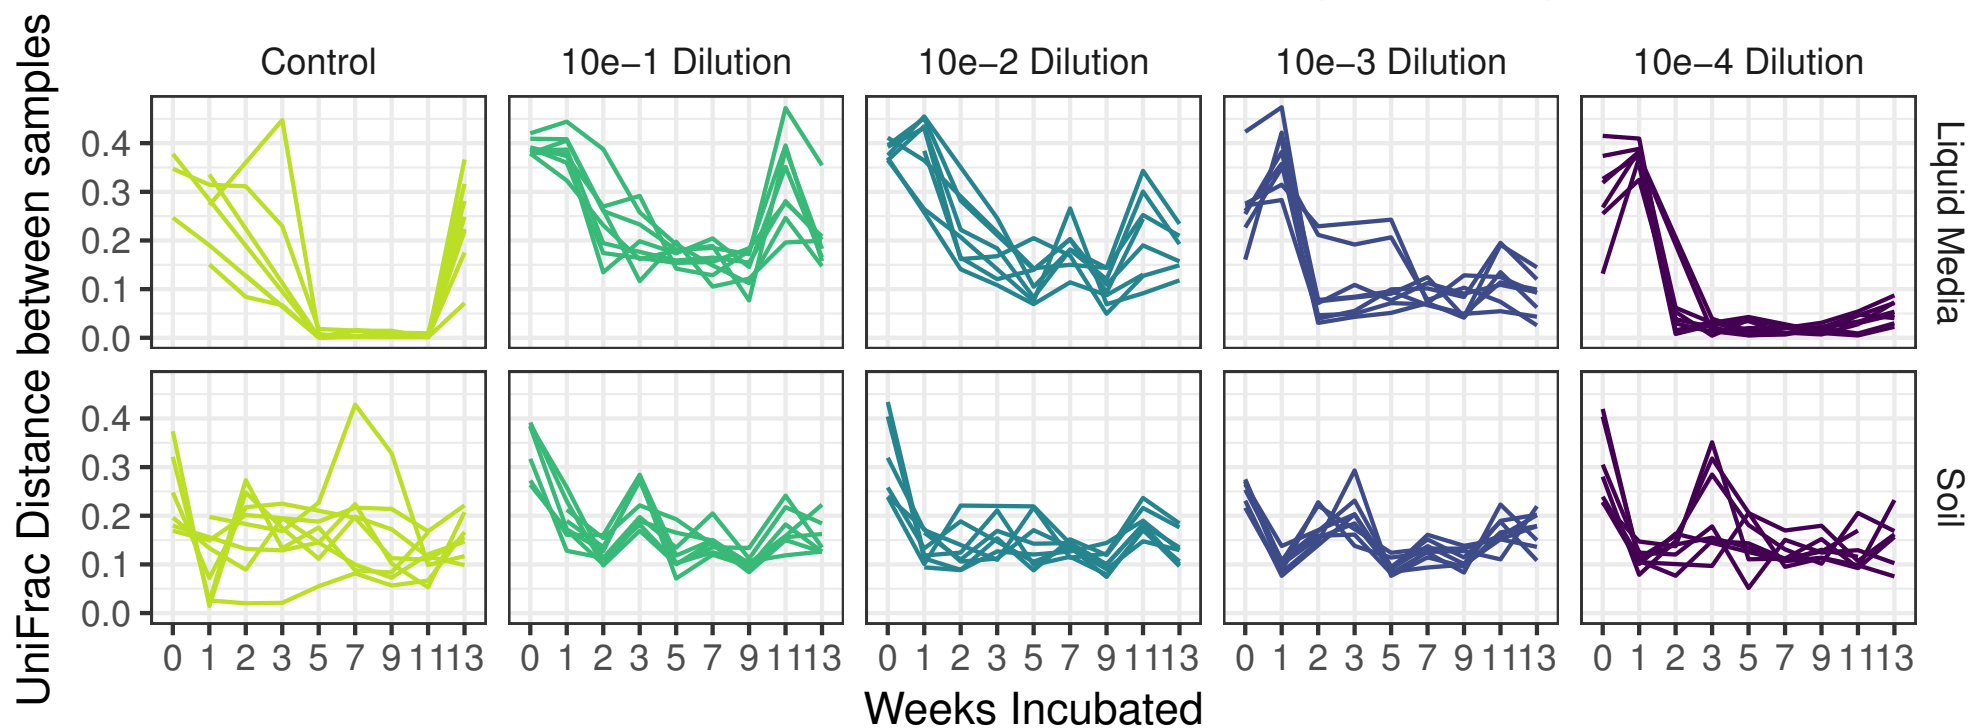

# **B** ITS: Weighted UniFrac Distances between subsequent timepoints

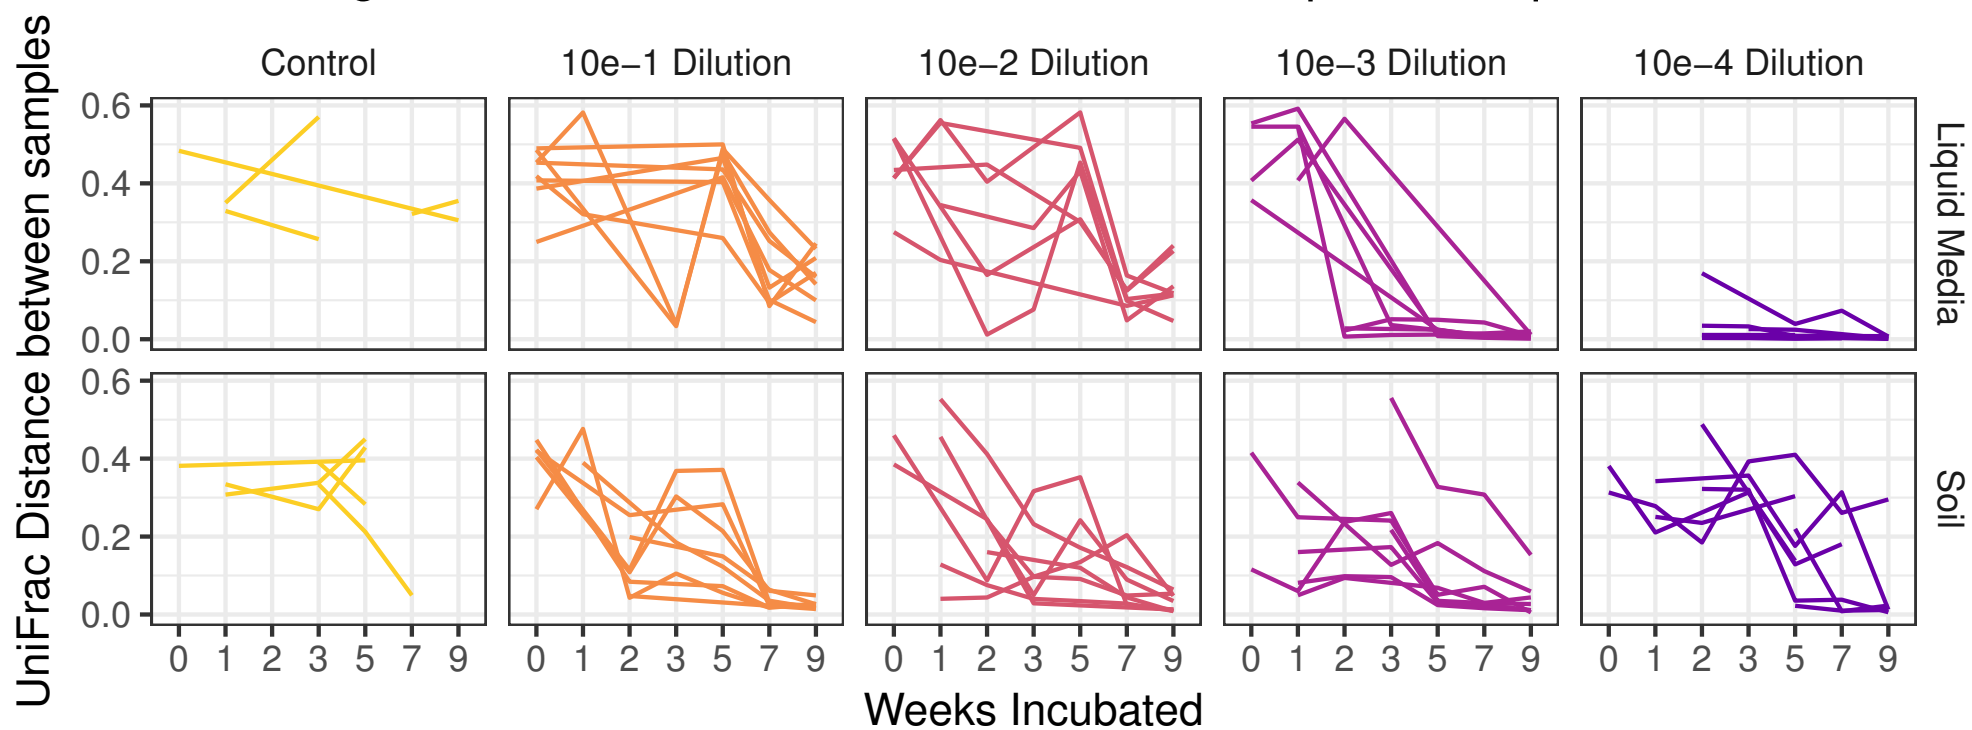

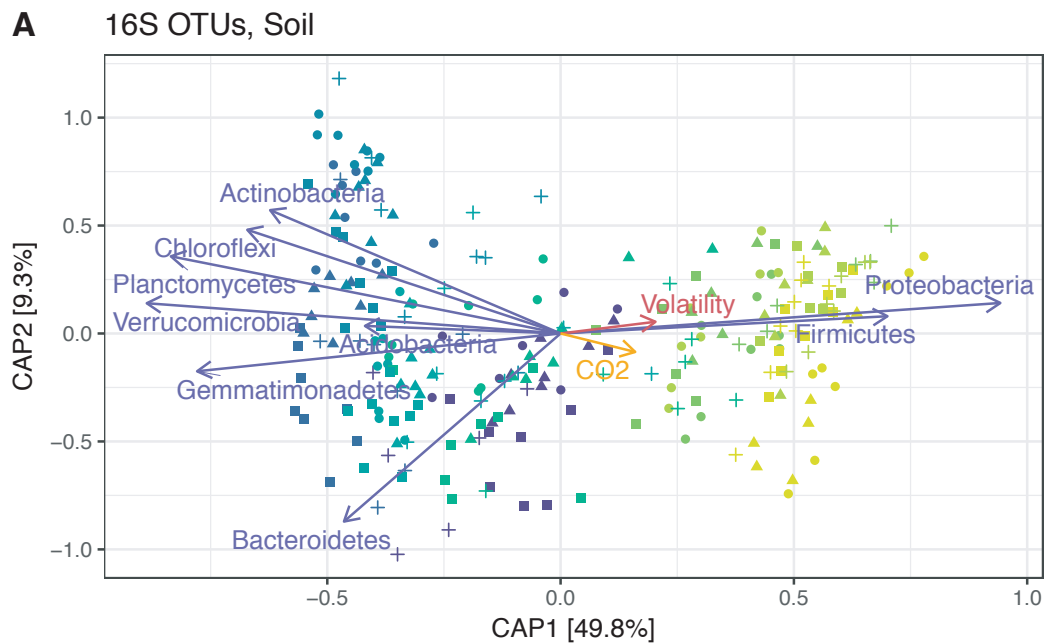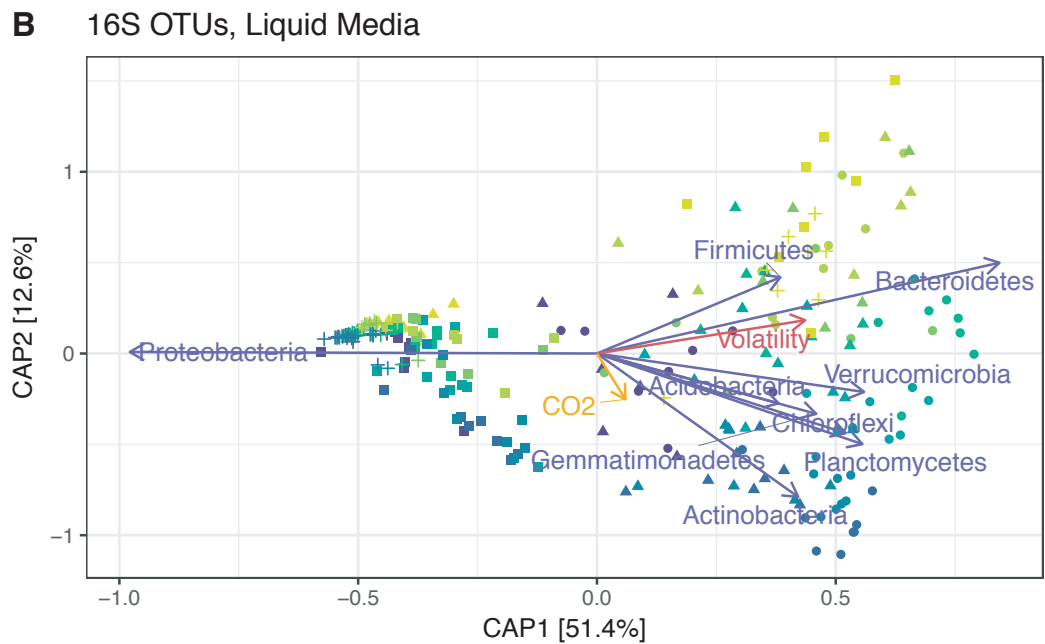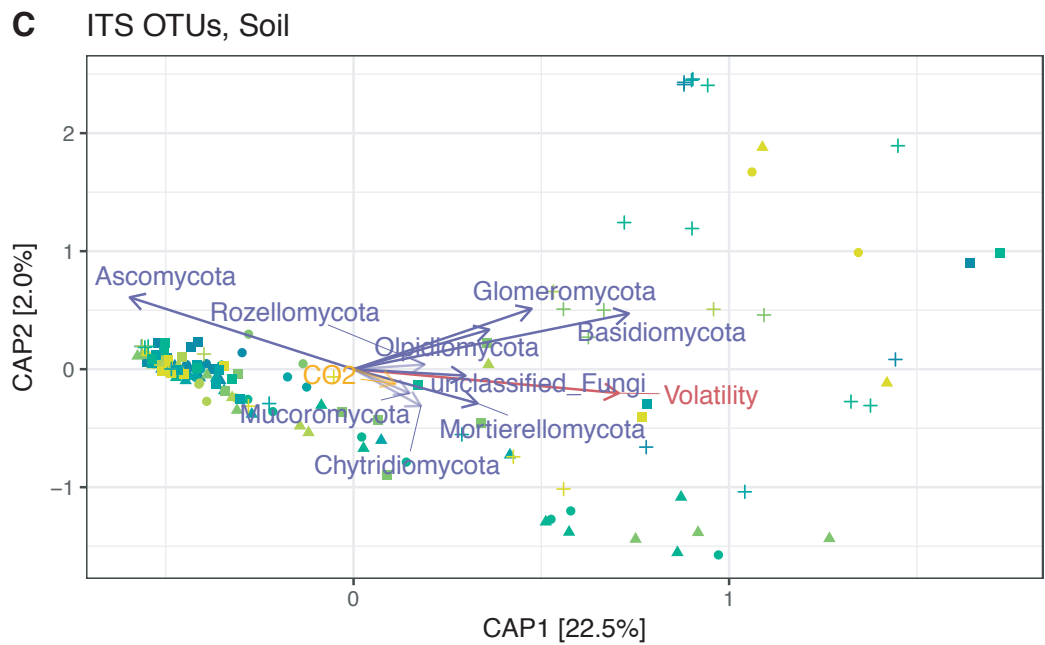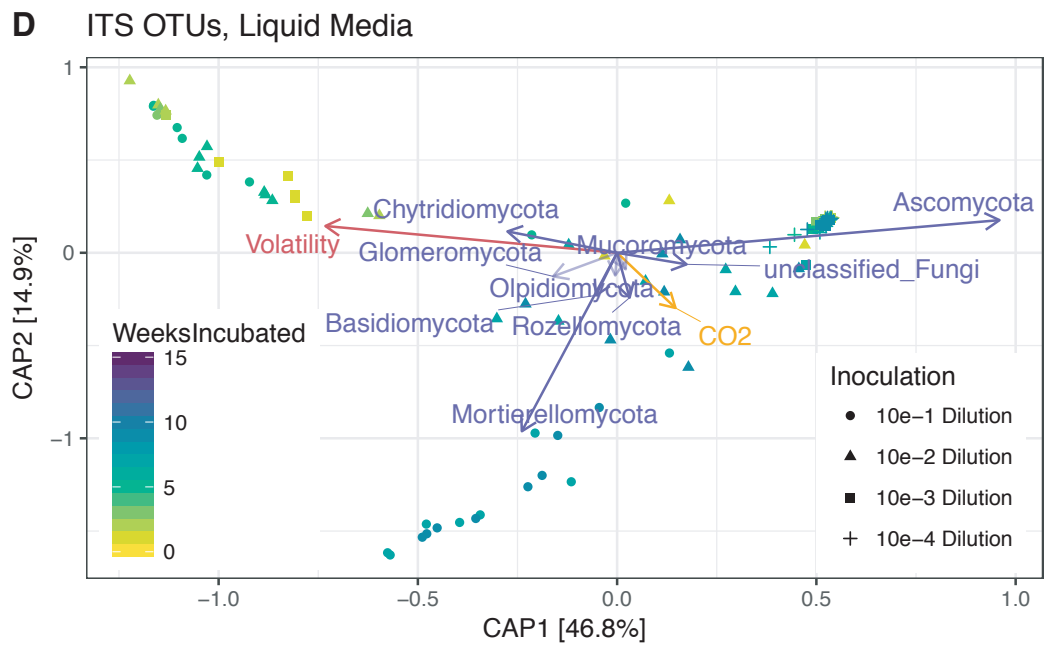

**A**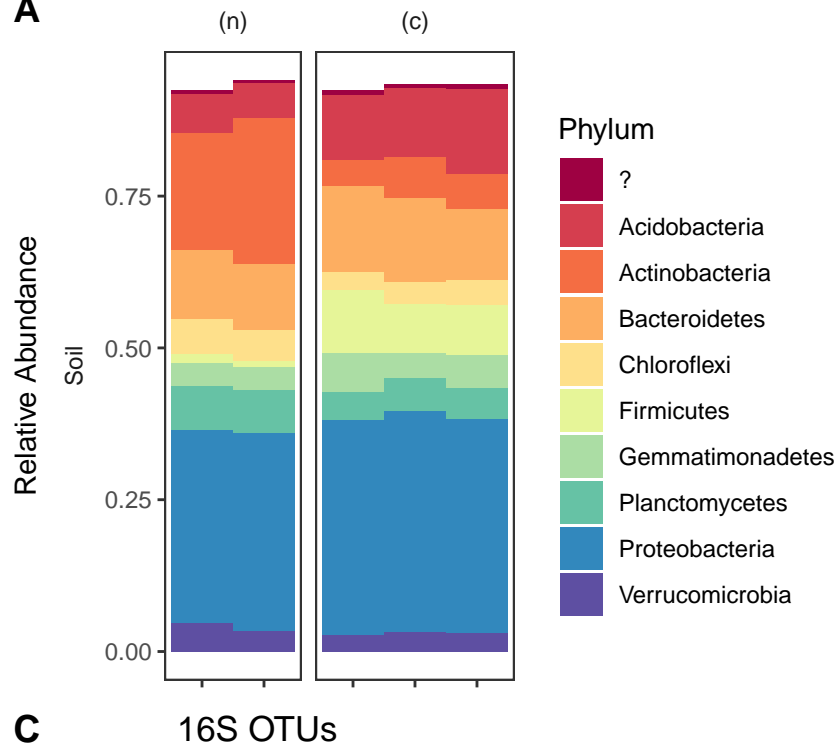**B**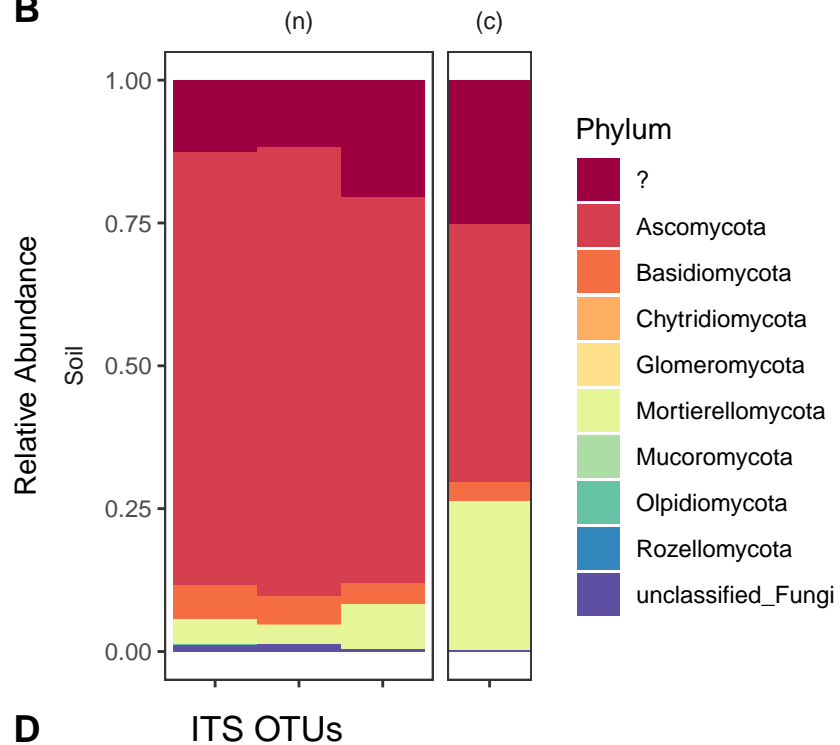**C**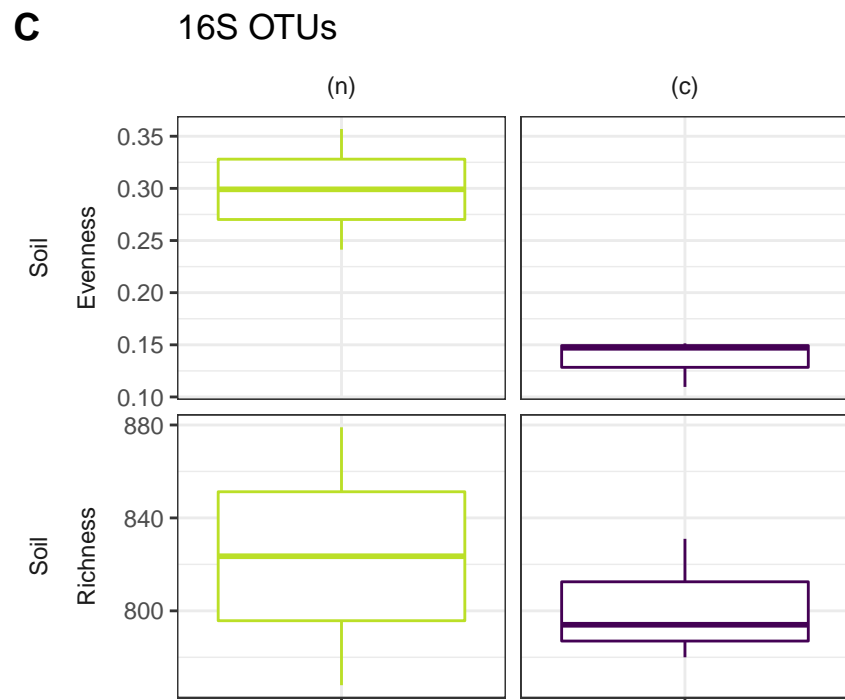**D**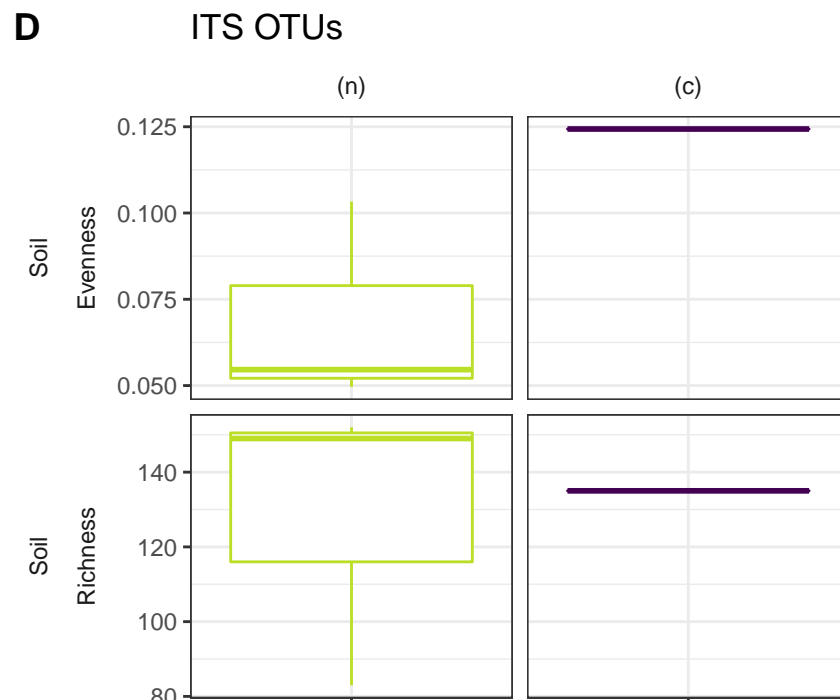





# 16S: The most abundant OTUs in negative controls also occur in other samples

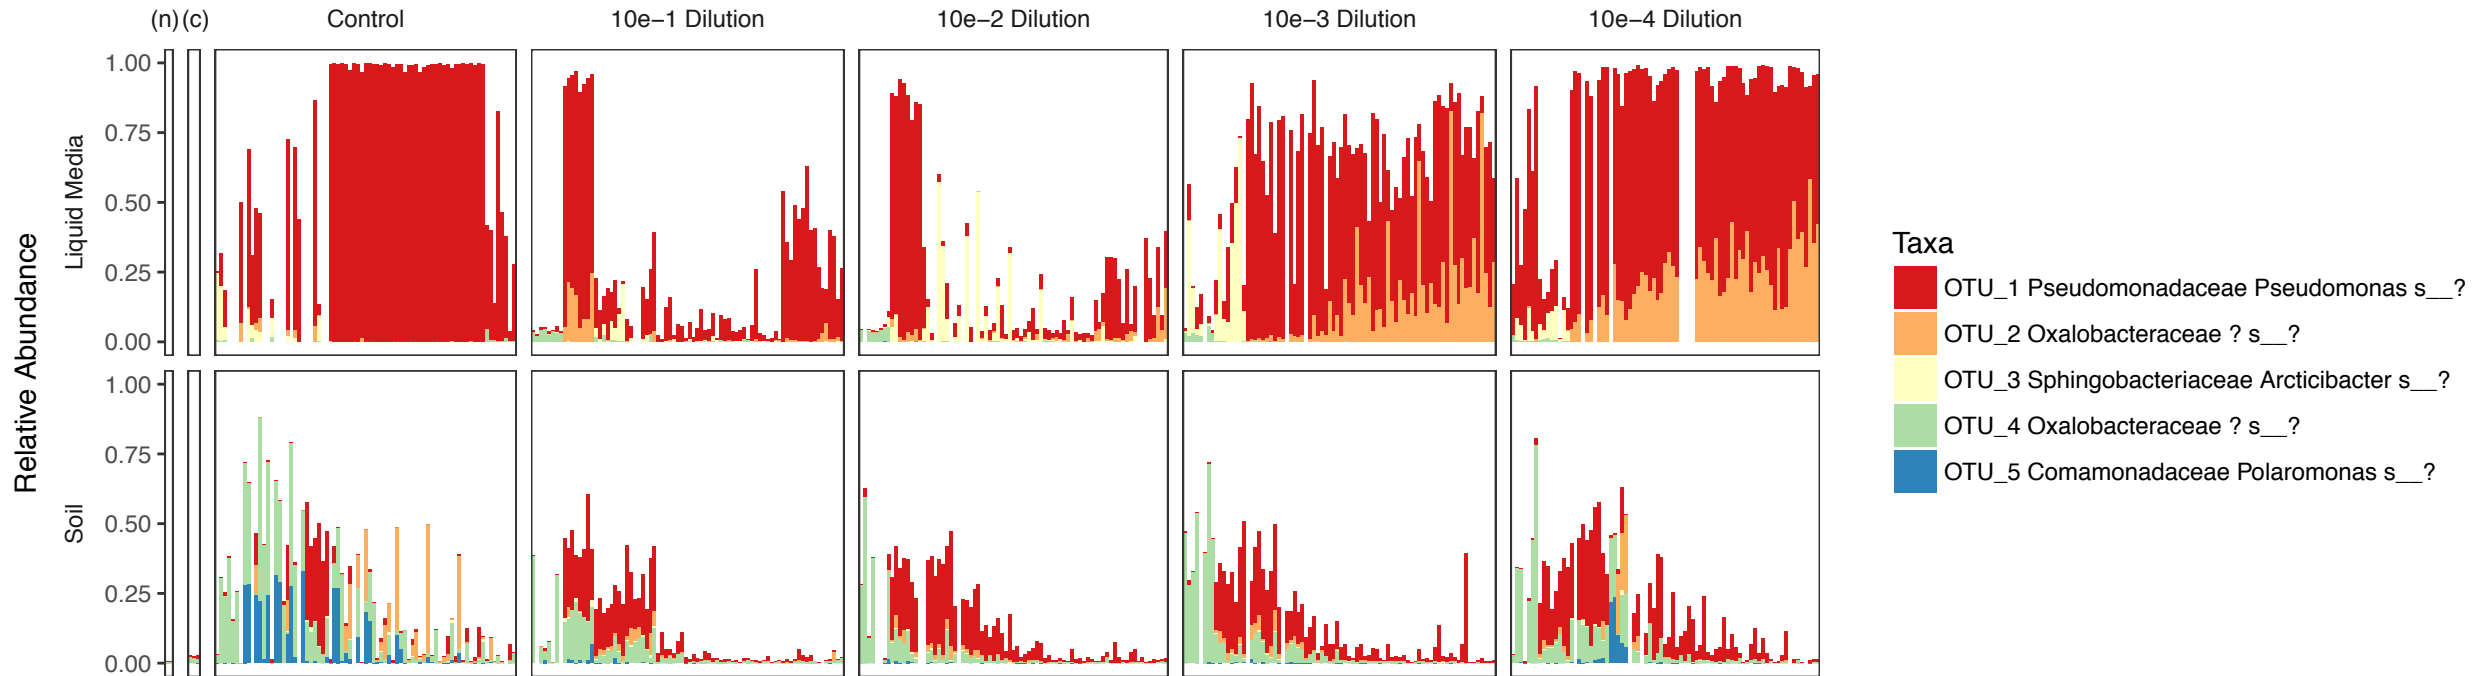

**Table S1.** Final species richness significantly varies between dilutions. A Tukey's HSD test was performed to compare richness between dilutions, and the p-values are shown here.

| Type | Treatment | 10e-2 Dilution -<br>10e-1 Dilution | 10e-3 Dilution -<br>10e-1 Dilution | 10e-3 Dilution -<br>10e-2 Dilution | 10e-4 Dilution -<br>10e-1 Dilution | 10e-4 Dilution -<br>10e-2 Dilution | 10e-4 Dilution -<br>10e-3 Dilution |
|------|-----------|------------------------------------|------------------------------------|------------------------------------|------------------------------------|------------------------------------|------------------------------------|
| 16S  | Soil      | 0.002598                           | 0                                  | 0                                  | 0                                  | 0                                  | 0.1138814                          |
| 16S  | Liquid    | 0                                  | 0                                  | 0                                  | 0                                  | 0                                  | 0.0000024                          |
| ITS  | Soil      | 0.0007323                          | 0                                  | 0.0000002                          | 0.0009251                          | 0.9998387                          | 0.0000002                          |
| ITS  | Liquid    | 0                                  | 0                                  | 0                                  | 0                                  | 0                                  | 0.0014198                          |

**Table S2.** Community composition of final timepoints is related to the initial condition with respect to dilution. On each set of endpoints, the adonis test was used to measure how much variation in weighted UniFrac distances between samples could be explained by the initial treatment (R2) and the probability that this level of similarity between endpoints would be seen by chance alone (p value).

| Type | Treatment         | R2        | p.value |
|------|-------------------|-----------|---------|
| 16S  | Inoculated Soil   | 0.3109907 | 0.001   |
| 16S  | Inoculated Liquid | 0.7656066 | 0.001   |
| ITS  | Inoculated Soil   | 0.2955797 | 0.008   |
| ITS  | Inoculated Liquid | 0.6843260 | 0.001   |

**Table S3.** Outputs from the tests ofr homogeneity of multivariate dispersions performed with respect to each treatment.

> dist.t1 # 16S liquid

Permutation test for homogeneity of multivariate dispersions  
 Permutation: free  
 Number of permutations: 999

Response: Distances

|           | Df  | Sum Sq  | Mean Sq   | F      | N.Perm | Pr(>F)  |
|-----------|-----|---------|-----------|--------|--------|---------|
| Groups    | 7   | 0.10181 | 0.0145443 | 1.8706 | 999    | 0.076 . |
| Residuals | 230 | 1.78834 | 0.0077754 |        |        |         |

---

Signif. codes: 0 '\*\*\*' 0.001 '\*\*' 0.01 '\*' 0.05 '.' 0.1 ' ' 1

Pairwise comparisons:

(Observed p-value below diagonal, permuted p-value above diagonal)

|    | 1         | 2         | 3         | 5         | 7         | 9         | 11        | 13    |
|----|-----------|-----------|-----------|-----------|-----------|-----------|-----------|-------|
| 1  |           | 0.8570000 | 0.9010000 | 0.5530000 | 0.8400000 | 0.8880000 | 0.8960000 | 0.030 |
| 2  | 0.8408961 |           | 0.7740000 | 0.6240000 | 0.6050000 | 0.6170000 | 0.6670000 | 0.008 |
| 3  | 0.9265345 | 0.7727334 |           | 0.5420000 | 0.9460000 | 0.9870000 | 0.9900000 | 0.056 |
| 5  | 0.5615476 | 0.6364887 | 0.5304231 |           | 0.3310000 | 0.3530000 | 0.4290000 | 0.003 |
| 7  | 0.8517255 | 0.6004488 | 0.9517810 | 0.3350217 |           | 0.9540000 | 0.9660000 | 0.010 |
| 9  | 0.8858396 | 0.6537449 | 0.9847483 | 0.3672397 | 0.9510812 |           | 1.0000000 | 0.013 |
| 11 | 0.8932968 | 0.6887733 | 0.9862912 | 0.4095452 | 0.9556976 | 0.9992465 |           | 0.017 |
| 13 | 0.0266473 | 0.0043442 | 0.0578710 | 0.0016131 | 0.0122193 | 0.0104359 | 0.0176215 |       |

> dist.t2 # ITS liquid

Permutation test for homogeneity of multivariate dispersions

Permutation: free

Number of permutations: 999

Response: Distances

|           | Df  | Sum Sq | Mean Sq  | F      | N.Perm | Pr(>F) |
|-----------|-----|--------|----------|--------|--------|--------|
| Groups    | 5   | 0.3227 | 0.064534 | 1.4987 | 999    | 0.211  |
| Residuals | 111 | 4.7796 | 0.043060 |        |        |        |

Pairwise comparisons:

(Observed p-value below diagonal, permuted p-value above diagonal)

|   | 1         | 2         | 3         | 5         | 7         | 9     |
|---|-----------|-----------|-----------|-----------|-----------|-------|
| 1 |           | 0.5380000 | 0.6650000 | 0.8540000 | 0.0590000 | 0.046 |
| 2 | 0.5282076 |           | 0.8820000 | 0.3270000 | 0.6480000 | 0.559 |
| 3 | 0.6468981 | 0.8809688 |           | 0.4620000 | 0.4420000 | 0.379 |
| 5 | 0.8500822 | 0.3317161 | 0.4825647 |           | 0.0200000 | 0.011 |
| 7 | 0.0566343 | 0.6407747 | 0.4688704 | 0.0165584 |           | 0.794 |
| 9 | 0.0434862 | 0.5295390 | 0.3830110 | 0.0091688 | 0.7722660 |       |

> dist.t3 # 16S soil

Permutation test for homogeneity of multivariate dispersions

Permutation: free

Number of permutations: 999

Response: Distances

|           | Df  | Sum Sq  | Mean Sq   | F      | N.Perm | Pr(>F)    |
|-----------|-----|---------|-----------|--------|--------|-----------|
| Groups    | 7   | 0.05119 | 0.0073129 | 4.7308 | 999    | 0.001 *** |
| Residuals | 236 | 0.36481 | 0.0015458 |        |        |           |

---

Signif. codes: 0 '\*\*\*' 0.001 '\*\*' 0.01 '\*' 0.05 '.' 0.1 ' ' 1

Pairwise comparisons:

(Observed p-value below diagonal, permuted p-value above diagonal)

|    | 1          | 2          | 3          | 5          | 7          | 9          | 11         | 13    |
|----|------------|------------|------------|------------|------------|------------|------------|-------|
| 1  |            | 8.7700e-01 | 5.0000e-02 | 1.0000e-03 | 6.0000e-02 | 1.0000e-02 | 1.0000e-03 | 0.007 |
| 2  | 8.7035e-01 |            | 6.3000e-02 | 1.0000e-03 | 8.9000e-02 | 1.9000e-02 | 1.0000e-03 | 0.024 |
| 3  | 3.8715e-02 | 7.4086e-02 |            | 4.0000e-02 | 7.1400e-01 | 8.4500e-01 | 1.9100e-01 | 0.564 |
| 5  | 5.3112e-06 | 4.0466e-05 | 3.7731e-02 |            | 6.0000e-03 | 3.2000e-02 | 3.2300e-01 | 0.161 |
| 7  | 5.2127e-02 | 1.0219e-01 | 7.0321e-01 | 6.1211e-03 |            | 4.6700e-01 | 4.6000e-02 | 0.291 |
| 9  | 6.8351e-03 | 1.9589e-02 | 8.2379e-01 | 3.1001e-02 | 4.8615e-01 |            | 2.0600e-01 | 0.655 |
| 11 | 7.7709e-05 | 4.6176e-04 | 1.8310e-01 | 3.2948e-01 | 5.1248e-02 | 1.9689e-01 |            | 0.521 |
| 13 | 9.5279e-03 | 2.1375e-02 | 5.6273e-01 | 1.6736e-01 | 3.1211e-01 | 6.5370e-01 | 5.4121e-01 |       |

> dist.t4 # ITS soil

Permutation test for homogeneity of multivariate dispersions

Permutation: free

Number of permutations: 999

Response: Distances

|           | Df  | Sum Sq  | Mean Sq  | F      | N.Perm | Pr(>F)  |
|-----------|-----|---------|----------|--------|--------|---------|
| Groups    | 5   | 0.25738 | 0.051476 | 2.9098 | 999    | 0.015 * |
| Residuals | 139 | 2.45898 | 0.017691 |        |        |         |

---

Signif. codes: 0 '\*\*\*' 0.001 '\*\*' 0.01 '\*' 0.05 '.' 0.1 ' ' 1

Pairwise comparisons:

(Observed p-value below diagonal, permuted p-value above diagonal)

|   | 1          | 2          | 3          | 5          | 7          | 9     |
|---|------------|------------|------------|------------|------------|-------|
| 1 |            | 0.01700000 | 0.23900000 | 0.85600000 | 0.05900000 | 0.125 |
| 2 | 0.01559845 |            | 0.02700000 | 0.00100000 | 0.53400000 | 0.634 |
| 3 | 0.26680358 | 0.02495234 |            | 0.14400000 | 0.15800000 | 0.267 |
| 5 | 0.84991942 | 0.00083406 | 0.15323977 |            | 0.01100000 | 0.029 |
| 7 | 0.05433724 | 0.54623469 | 0.16086438 | 0.01024285 |            | 0.981 |
| 9 | 0.10751451 | 0.60413746 | 0.26867577 | 0.03429609 | 0.98502734 |       |
